# Supplementary material for: Performance of T-Track® TB, a Novel Dual Marker RT-qPCR-Based Whole-Blood Test for Improved Detection of Active Tuberculosis
Source: MDPI journal article supplement (doi:10.3390/diagnostics13040758), 2023-02-16
Supplement: s1 [file s1]

**Table S1.** Recruiting centres and number (N) of suspected active tuberculosis (TB) patients and non-TB controls enrolled in the study

| Study Center                                                                                                                                  | Active TB<br>(N) | Non-TB controls<br>(N) | Total<br>(N) |
|-----------------------------------------------------------------------------------------------------------------------------------------------|------------------|------------------------|--------------|
| Institute for Medical Microbiology and Hygiene, University of Regensburg, Germany                                                             | 0                | 241                    | 241          |
| Department of Tuberculosis/Infectious Lung Disease,<br>Asklepios Lungenklinik Gauting, Germany                                                | 162              | 8                      | 170          |
| Institute for Transfusion Medicine, Laboratory Medicine and Medical Microbiology, Medical<br>Center Dortmund, Germany <sup>1</sup>            | 24               | 11                     | 35           |
| Fachklinik für Pneumologie, Thoraxchirurgie, Rehabilitation, Schlaf- und Beatmungsmedizin,<br>Münnerstadt, Germany                            | 27               | 0                      | 27           |
| Department of Hematology, Medical Oncology, and Pneumology, University Medical Center<br>of the Johannes Gutenberg University, Mainz, Germany | 15               | 0                      | 15           |
| Center for Pneumology, Donaustauf Hospital, Germany                                                                                           | 12               | 0                      | 12           |
| Lungenärzte am Rundfunkplatz, Munich, Germany                                                                                                 | 10               | 0                      | 10           |
| Karl Landsteiner Privatuniversität für Gesundheitswissenschaften, Universitätsklinikum<br>Krems, Krems an der Donau, Austria                  | 9                | 0                      | 9            |
| Klinikum Chemnitz gGmbH, Chemnitz, Germany                                                                                                    | 1                | 6                      | 7            |
| Department of Infectious Diseases and Tropical Medicine,<br>Klinikum St. Georg gGmbH Leipzig, Germany                                         | 4                | 2                      | 6            |
| Klinikum Wels-Grieskirchen GmbH, Wels, Austria                                                                                                | 4                | 0                      | 4            |
| Department for Pneumology and Critical Care Medicine, Thoraxklinik<br>University of Heidelberg, Germany                                       | 2                | 0                      | 2            |
| Internal Medicine 2, University Hospital of St. Pölten, Sankt Pölten, Austria                                                                 | 2                | 0                      | 2            |
| Department of Internal Medicine I, University Clinical Centre Tübingen, Germany                                                               | 1                | 0                      | 1            |
| <b>Total (N)</b>                                                                                                                              | <b>273</b>       | <b>268</b>             | <b>541</b>   |

<sup>1</sup> Also acting as one of the two measuring centers (together with Mikrogen GmbH, Regensburg, Germany)

**Table S2.** Characteristics of the active TB samples included in the analysis (n=181)

| Characteristics                          | N (%)        |
|------------------------------------------|--------------|
| Study population                         | 181 (100.0%) |
| Active TB diagnosis                      |              |
| Positive <i>Mtb</i> culture <sup>1</sup> | 177 (97.8%)  |
| Positive microscopy and PCR              | 4 (2.2%)     |
| Organ involvement                        |              |
| Pulmonary TB                             | 122 (67.4%)  |
| Extra-pulmonary TB                       | 28 (15.5%)   |
| Pulmonary and extra-pulmonary TB         | 31 (17.1%)   |

<sup>1</sup> Of the 177 culture-positive analysed patients, 92 (52.0%) were simultaneously microscopy- and PCR-positive for TB. Abbreviations: *Mtb*, *Mycobacterium tuberculosis*; TB, tuberculosis.

**Table S3.** Diagnostic sensitivity of T-Track® TB and QFT-Plus in pulmonary TB patients, according to their sputum status (n=146 pulmonary TB patients with either a sputum-negative [n=58] or a sputum-positive [n=88] status)

| Assay                    | Sputum status | Sensitivity   |             |
|--------------------------|---------------|---------------|-------------|
|                          |               | n/N (%)       | [95% CI]    |
| T-Track® TB <sup>1</sup> | Negative      | 53/57 (93.0%) | [82.8–97.7] |
|                          | Positive      | 81/85 (95.3%) | [88.1–98.5] |
| QFT-Plus <sup>2</sup>    | Negative      | 44/56 (78.6%) | [66.0–87.4] |
|                          | Positive      | 76/88 (86.4%) | [77.5–92.2] |

<sup>1</sup> After exclusion of three invalid and one inconclusive T-Track® TB results, sensitivity was evaluated on 142 pulmonary TB samples (57 sputum-negative, 85 sputum-positive); <sup>2</sup> After exclusion of one indeterminate and one missing QFT-Plus results, sensitivity was evaluated on 144 pulmonary TB samples (56 sputum-negative, 88 sputum-positive). A Fisher's exact test showed no statistically significant difference between the sensitivity of sputum-negative and sputum-positive detection by T-Track® TB (p=0.714) or by QFT-Plus (p=0.255). As for the total TB population (Table 2 and section 3.3.1.), the difference in sensitivity between T-Track® TB and QFT-Plus, tested on common samples within the sputum-negative (n=55) and sputum-positive (n=85) population, was statistically significant (92.7% *vs.* 80.0% for sputum-negative patients and 95.3% *vs.* 87.1% for sputum-positive patients; McNemar, p=0.046 in both cases). Abbreviations: CI, confidence interval; QFT-Plus, QuantiFERON®-TB Gold Plus; TB, tuberculosis.
